# Supplementary material for: Access to clinical trials among oncology patients: results of a cross sectional survey
Source: Springer Nature journal article supplement (doi:10.1186/s12885-017-3644-3), 2017-09-18
Supplement: MOESM1 [file 15068878]

## Participation in Clinical Trials

This next section asks about your experiences with taking part in clinical trials. A clinical trial is a research study where participants are assigned by chance (randomly) to receive the new treatment or usual treatment. Please circle the number that best describes your answer.

---

- B1. Since your cancer diagnosis, have you been asked to take part in a clinical trial?**
- 1 Yes  
2 No (*go to Section C on the next page*)
- 

- B2. What was the clinical trial about?**  
*Please circle all that apply*
- 1 Surgical treatments  
2 Radiation therapy treatments  
3 Chemotherapy treatments  
4 Complementary or natural therapies  
5 Psychological well being  
6 Can't remember  
7 Other (please specify) \_\_\_\_\_
- 

- B3. Did you choose to participate in the clinical trial?**
- 1 Yes  
2 No (*go to Question 5*)

(If you have been asked to participate in more than one trial, please think about the last trial you were invited to take part in when answering)

---

- B4. Now that you think back, would you agree to take part in the clinical trial again?**
- 1 Yes (*go to Question 6*)  
2 No (*go to Question 6*)  
3 Not sure (*go to Question 6*)

*Please circle one number only*

---

- B5. Why didn't you want to participate in the trial?**
- 1 I do not like the idea of clinical trials  
2 I wanted to choose my treatment  
3 I did not understand what it involved  
4 I was worried about the risks/side effects  
5 My loved ones did not want me to  
6 Other (please specify) \_\_\_\_\_
- 

- B6. Imagine that you are participating in a clinical trial and a new trial comes up that you could participate in as well. What should happen?**
- 1 I should not be asked about the second trial  
2 The researcher should check if my doctor thinks I should participate in the trial before discussing it with me  
3 I should be asked directly if I want to participate in the second trial, and given the option to discuss it with my doctor if I want to
-
